# Supplementary material for: Methods for Predicting Ethylene/Cyclic Olefin Copolymerization Rates Promoted by Single-Site Metallocene: Kinetics Is the Key
Source: MDPI journal article supplement (doi:10.3390/polym14030459), 2022-01-24
Supplement: s1 [file s1]

## *Supporting information*

### **Methods for Predicting Ethylene/cyclic Copolymerization Rates promoted by Single-site Metallocene: Kinetics is the Key**

Amjad Ali<sup>1, 5</sup>, Ahmad Naveed<sup>1</sup>, Tahir Rasheed<sup>2\*</sup>, Tariq Aziz<sup>3</sup>, Muhammad Imran<sup>4</sup>, Zhang Ze Kun<sup>5</sup>, Muhammad Wajid Ullah<sup>6</sup>, Aziz Ur Rehman<sup>4</sup>, Fan Zhiqiang<sup>5</sup>, Li Guo<sup>1\*</sup>

<sup>1</sup>Research School of Polymeric Materials, School of Materials Science & Engineering, Jiangsu University, Zhenjiang, 212013, P.R China.

<sup>2</sup>Interdisciplinary Research Center for Advanced Materials, King Fahd University of Petroleum and Minerals (KFUPM), Dhahran 31261, Saudi Arabia.

<sup>3</sup>Westlake University, School of Engineering Yunki Campus, Hangzhou, Zhejiang 310024 PR China.

<sup>4</sup>MOE Key Laboratory of Macromolecular Synthesis and Functionalization, Department of Polymer Science and Engineering, Zhejiang University, Hangzhou, 310027, P.R. China.

<sup>5</sup>Department of Chemistry, Government College University, Lahore, Pakistan.

<sup>6</sup>Biofuels Institute, School of Environment and Safty Engineering, Jiangsu University, Zhenjiang, 212013, P.R China.

**\*Corresponding author:** E-mail address: [masil@sjtu.edu.cn](mailto:masil@sjtu.edu.cn) (T. Rasheed);

[liguo@ujs.edu.cn](mailto:liguo@ujs.edu.cn) (Li Guo).

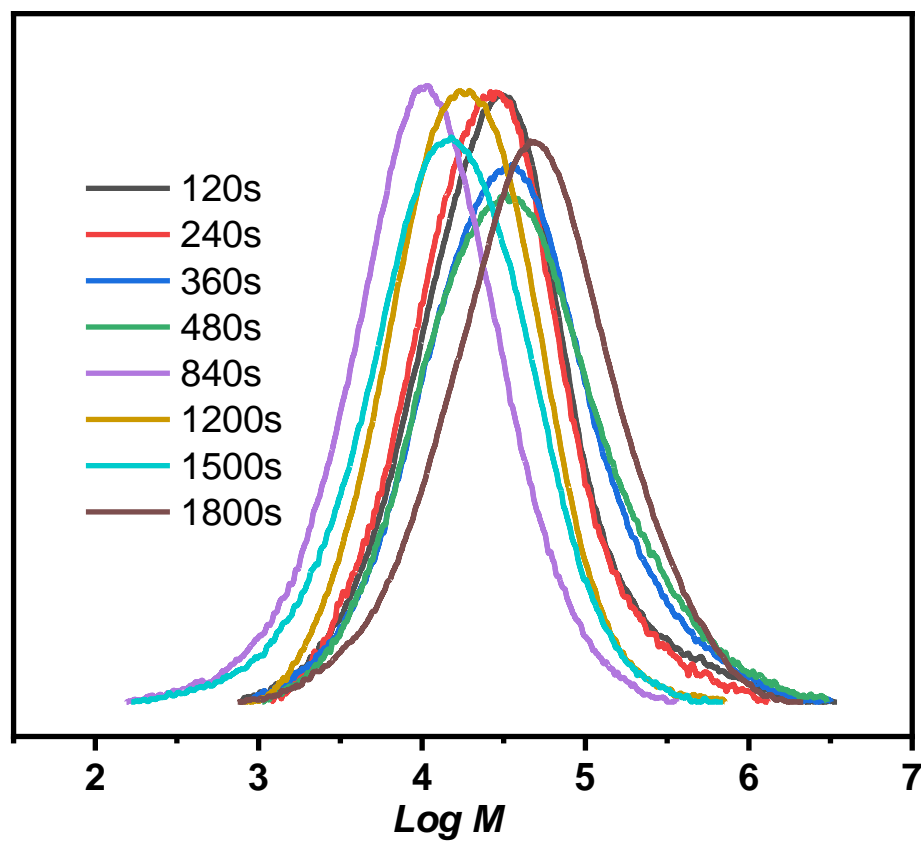

**Figure S1.** Change of molecular distribution of E/VCH copolymers with polymerization time

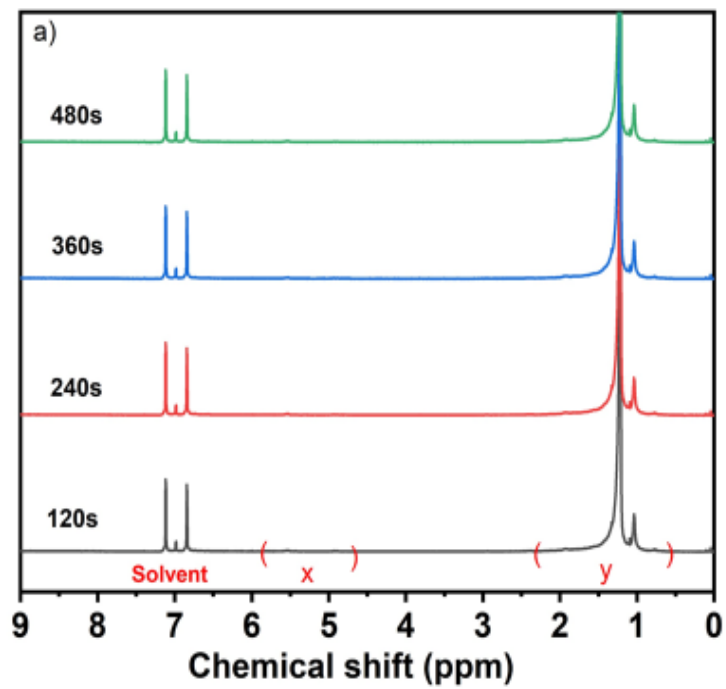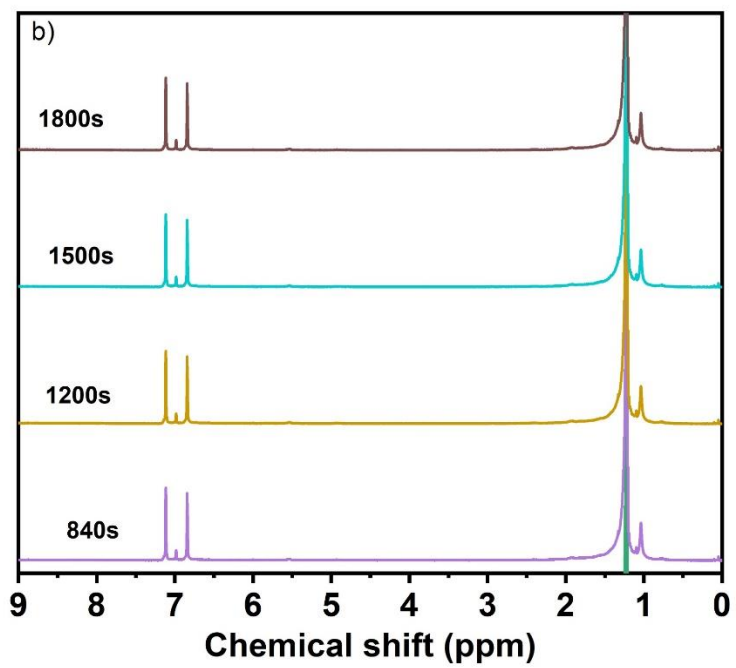

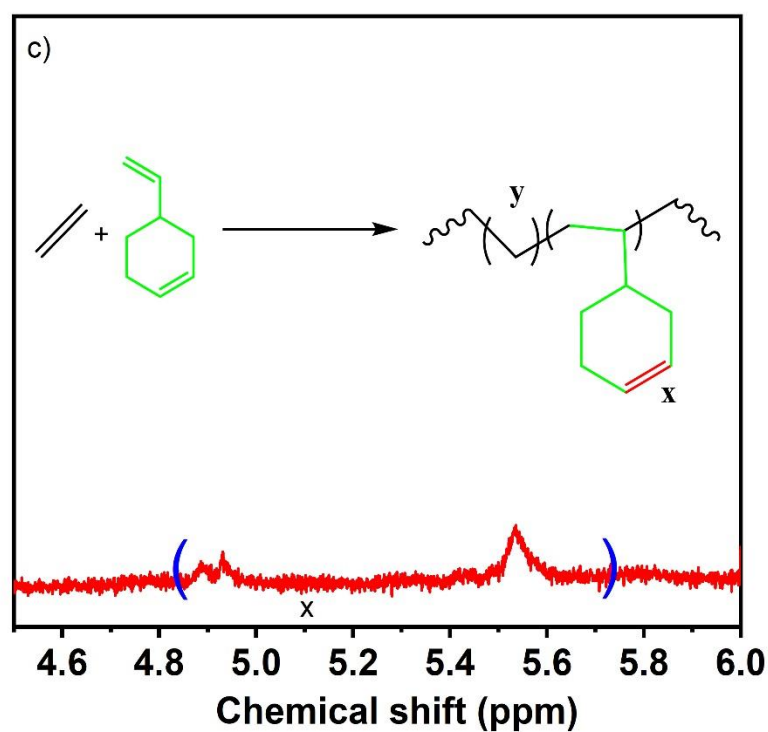

**Figure S2** HNMR Spectra's of the E/VCH copolymer

**Table S1** Calculation of  $R_p^{\text{VCH}}$  and  $K_p^{\text{VCH}}$  in the ethylene-VNB copolymerization.

| RUN | Time<br>see | VCH<br>In<br>polymer | VCH in<br>Pol<br>wt% | Mol <sub>VCH</sub> /mol <sub>cat</sub> | $R_p^{\text{VCH}}$ /mol <sub>cat</sub><br>molVNB/molcat<br>s | S<br>Ppm | *C<br>% | [VCH]<br>mol/L | $k_p$<br>VCH<br>L/mol<br>s |
|-----|-------------|----------------------|----------------------|----------------------------------------|--------------------------------------------------------------|----------|---------|----------------|----------------------------|
| 1.1 | 120         | 1.43                 | 0.053                | 114                                    | 0.78                                                         | 14.23    | 14.72   | 0.0572         | 93                         |
| 1.2 | 240         | 1.56                 | 0.058                | 243                                    | 0.66                                                         | 12.63    | 25.68   | 0.0539         | 48                         |
| 1.3 | 360         | 1.65                 | 0.061                | 297                                    | 0.55                                                         | 16.09    | 37.89   | 0.0526         | 28                         |
| 1.4 | 480         | 1.53                 | 0.057                | 331                                    | 0.46                                                         | 19.97    | 49.16   | 0.0517         | 18.1                       |
| 1.5 | 840         | 1.46                 | 0.054                | 481                                    | 0.27                                                         | 14.31    | 61.27   | 0.0480         | 9.18                       |
| 1.6 | 1200        | 1.41                 | 0.052                | 550                                    | 0.16                                                         | 13.06    | 66.17   | 0.0463         | 5.228                      |
| 1.7 | 1500        | 1.35                 | 0.050                | 628                                    | 0.1                                                          | 11.54    | 69.58   | 0.0443         | 3.244                      |
| 1.8 | 1800        | 1.22                 | 0.046                | 613                                    | 0.069                                                        | 11.30    | 73.38   | 0.0447         | 2.1048                     |

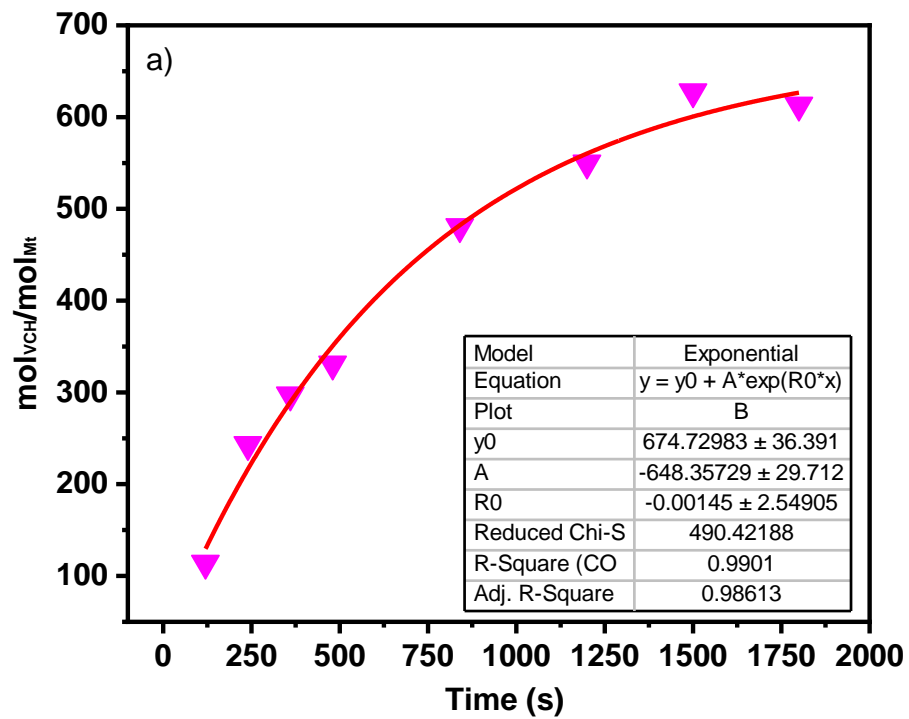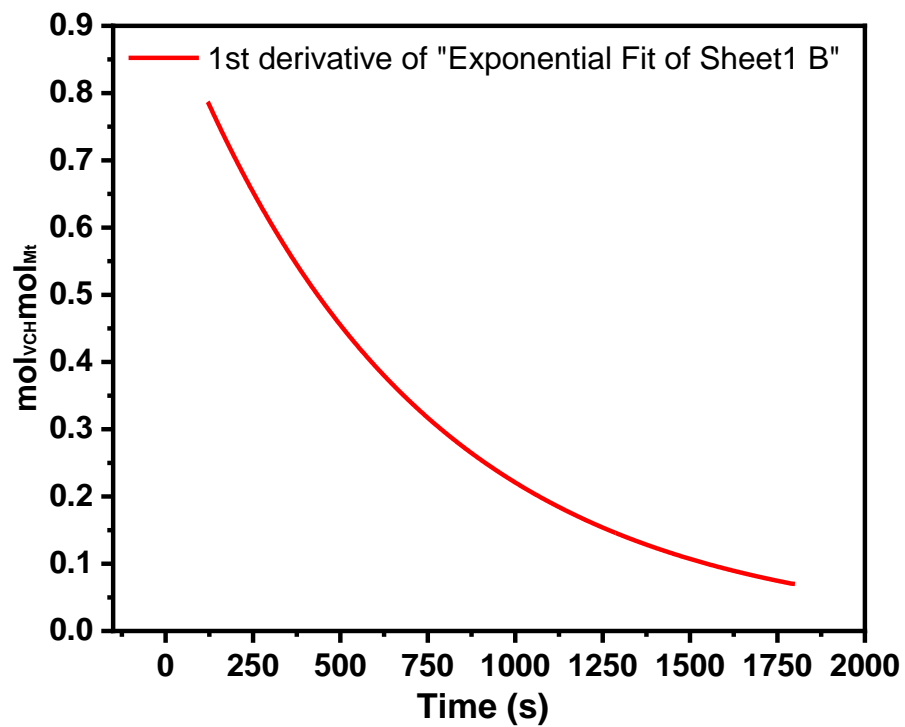

**Figure S3.** The plot of  $\text{mol}_{\text{VCH}}/\text{mol}_{\text{cat}}$  vs. time, and Differentiate.

**Table S2.** Calculation of  $R_p^E$  and  $K_p^E$  in the ethylene-VCH copolymerization.

| RUN | Time<br>see | VCH<br>In<br>polymer | VCH In<br>Pol<br>wt% | S<br>Ppm | *C<br>% | mE<br>g | $\text{mol}_E/\text{mol}_{\text{cat}}$ | $R_p^E$<br>molE/molcat s | $k_p^E$<br>L/mol s |
|-----|-------------|----------------------|----------------------|----------|---------|---------|----------------------------------------|--------------------------|--------------------|
| 1.1 | 120         | 1.43                 | 0.053                | 14.23    | 14.72   | 0.275   | 7846                                   | 39.63                    | 6410               |
| 1.2 | 240         | 1.56                 | 0.058                | 12.63    | 25.68   | 0.537   | 15347                                  | 36.72                    | 3405               |
| 1.3 | 360         | 1.65                 | 0.061                | 16.09    | 37.89   | 0.620   | 17710                                  | 33.94                    | 2133               |
| 1.4 | 480         | 1.53                 | 0.057                | 19.97    | 49.16   | 0.745   | 21294                                  | 31.41                    | 1521               |
| 1.5 | 840         | 1.46                 | 0.054                | 14.31    | 61.27   | 1.135   | 32431                                  | 24.86                    | 966                |
| 1.6 | 1200        | 1.41                 | 0.052                | 13.06    | 66.17   | 1.346   | 38449                                  | 19.67                    | 708                |
| 1.7 | 1500        | 1.35                 | 0.050                | 11.54    | 69.58   | 1.605   | 45863                                  | 16.17                    | 553                |
| 1.8 | 1800        | 1.22                 | 0.046                | 11.30    | 73.38   | 1.737   | 49634                                  | 13.32                    | 432                |

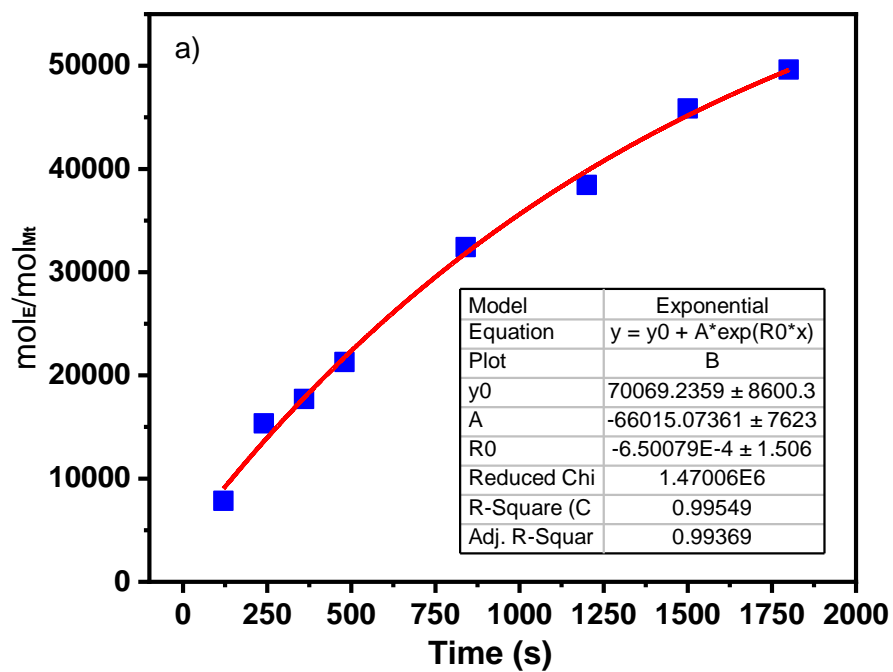

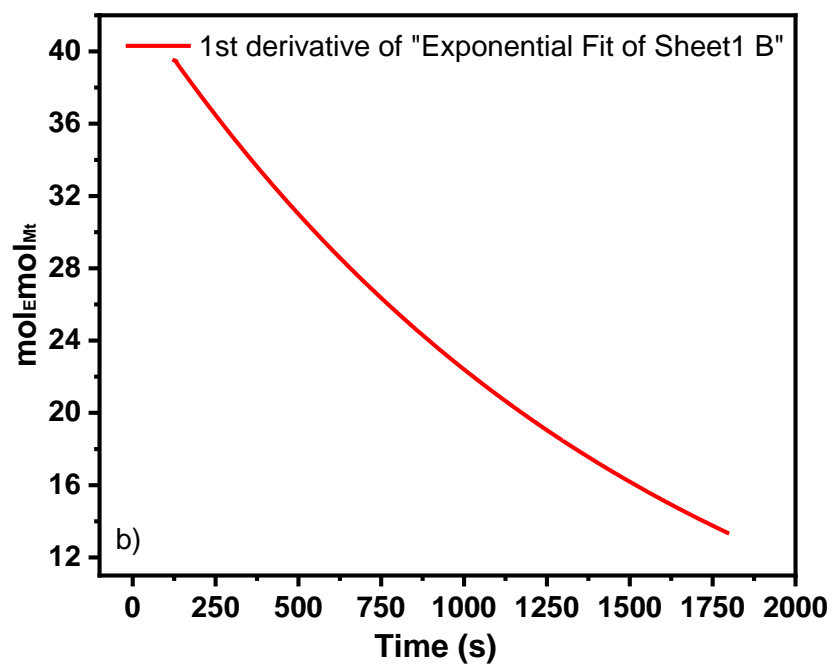

**Figure S4.**The plot of  $\text{mol}_E/\text{mol}_{\text{cat}}$  vs. time, and Differentiate
